# Supplementary material
Source: MDPI journal article supplement (https://www.mdpi.com/2311-5637/9/2/190)
Supplement: s1 [file s1]

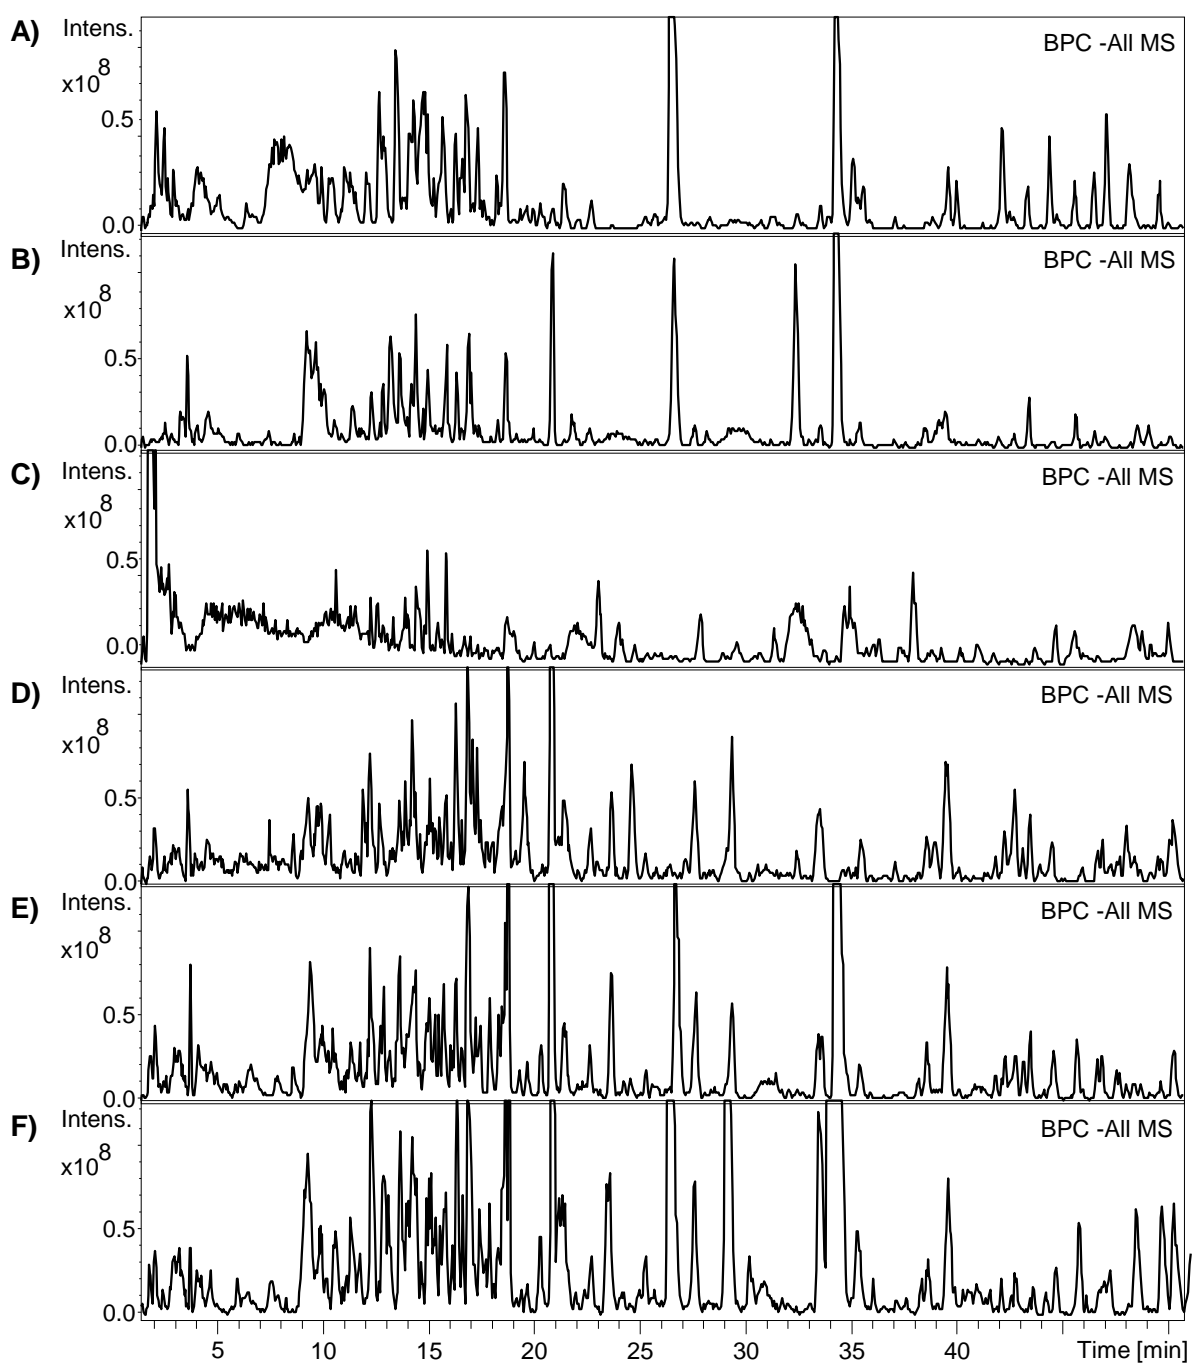

**Figure S1.** HPLC-MS<sup>n</sup> fingerprints (BPC = base peak chromatograms) of *M. perennis* extracts. **A)** Aqueous extract (AE). **B)** Lactobacteria inoculated fermentation (LBF, *L. plantarum* + *P. pentosaceus*). **C)** Whey. **D - F)** Whey inoculated fermentations (WF 1 - 3).

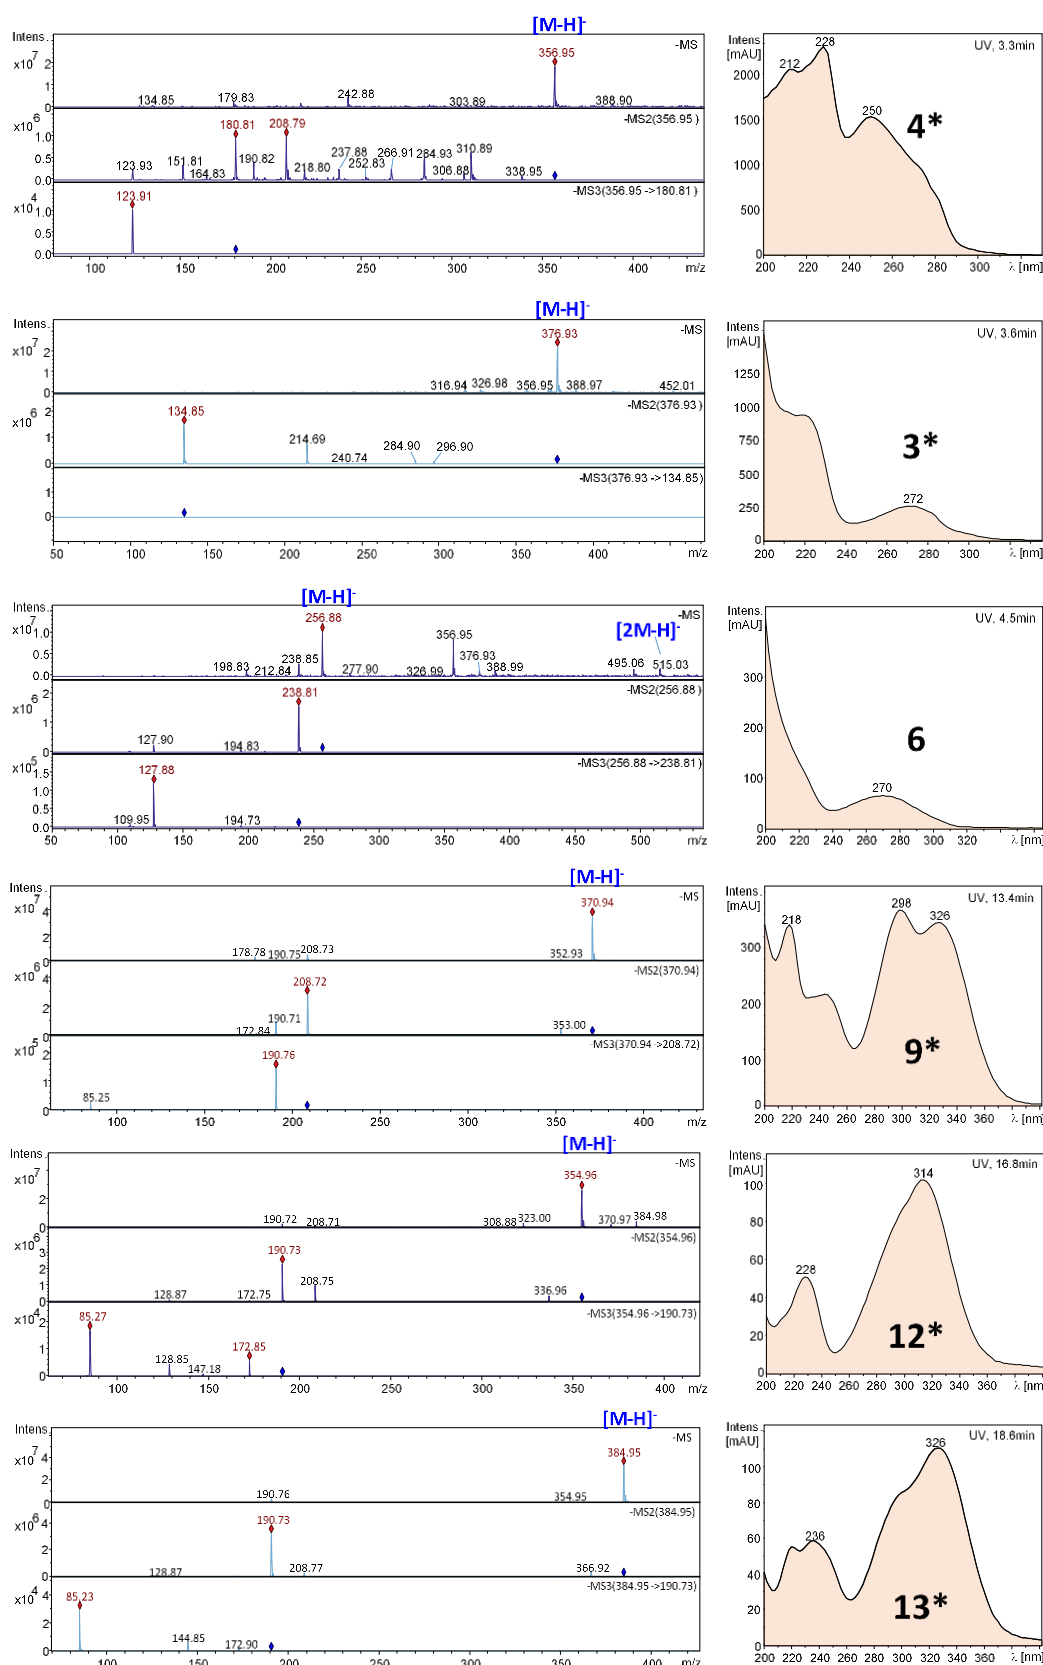

**Figure S2A.** Selection of  $MS^n(ESI^-)$  mass spectra (left) and UV spectra (right) of individual peaks, detected in the HPLC-DAD- $MS^n(ESI^-)$  chromatograms of the non-fermented (AE) and fermented extracts (LBF, WF) of *M. perennis* (see Fig. S1 and Table S1).

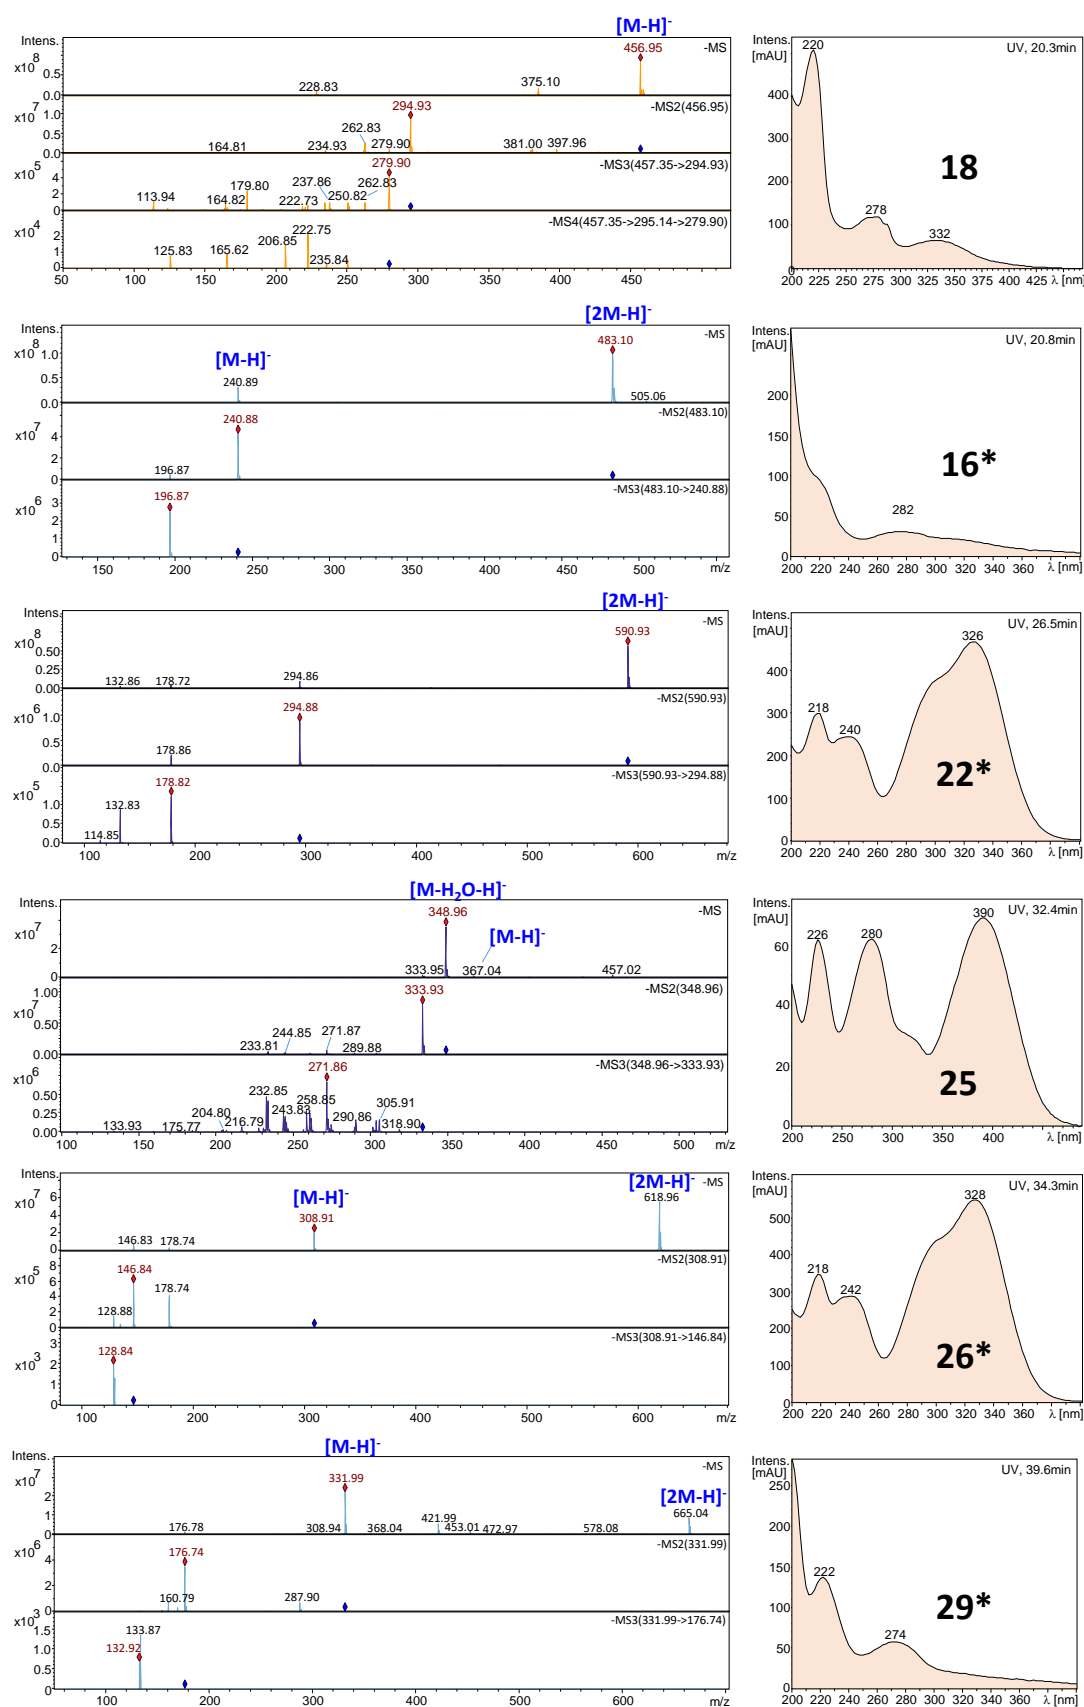

**Figure S2B.** (continuation). Selection of MS<sup>n</sup>(ESI<sup>-</sup>) mass spectra (left) and UV spectra (right) of individual peaks, detected in the HPLC-DAD-MS<sup>n</sup>(ESI<sup>-</sup>) chromatograms of the none-fermented (AE) and fermented extracts (LBF, WF) of *M. perennis* (see Fig. S1 and Table S1).

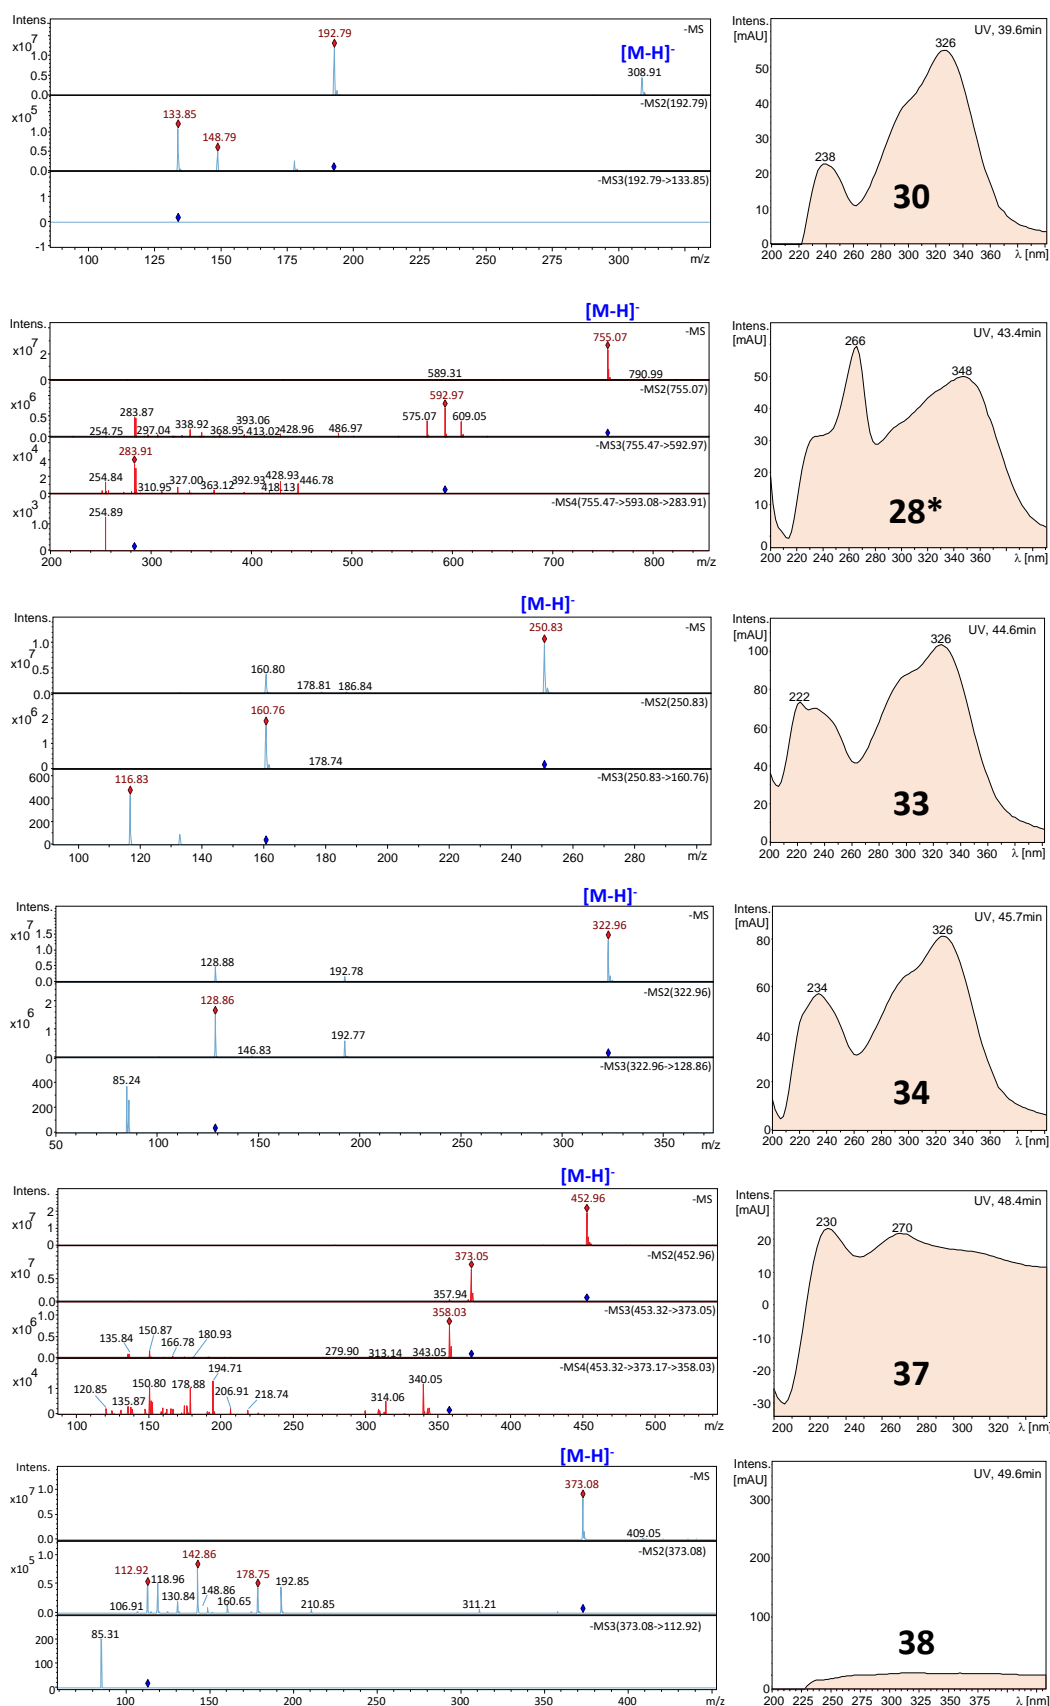

**Figure S2C.** (continuation). Selection of MS<sup>n</sup>(ESI<sup>-</sup>) mass spectra (left) and UV spectra (right) of individual peaks, detected in the HPLC-DAD-MS<sup>n</sup>(ESI<sup>-</sup>) chromatograms of the none-fermented (AE) and fermented extracts (LBF, WF) of *M. perennis* (see Fig. S1 and Table S1).

**Table S1.** Tentative assignment of polyphenolic constituents (depsides and flavonoids) in the water extract and lactic acid fermented extract, obtained from herbal parts of *M. perennis*, according HPLC-DAD-ESI(negative)-MS<sup>n</sup> data.

| Peak No. | Constituent                                           | t <sub>R</sub> [min]                                                                 | λ <sub>max</sub> (HPLC-DAD) [nm] | Mass spectrometric data                               |                                                                |                                         | Water extract | Fermented extracts | Literature reference* |
|----------|-------------------------------------------------------|--------------------------------------------------------------------------------------|----------------------------------|-------------------------------------------------------|----------------------------------------------------------------|-----------------------------------------|---------------|--------------------|-----------------------|
|          |                                                       |                                                                                      |                                  | MS <sup>1</sup> [m/z]                                 | MS <sup>2</sup> [m/z]                                          | MS <sup>3</sup> [m/z]                   |               |                    |                       |
| 1        | hexose oligomer                                       | 2.1                                                                                  | 212, sh<br>256                   | <u>669</u>                                            | <u>341</u> , 327, 283,<br>236                                  | 179, 161, <u>143</u> , 131              | V             |                    |                       |
| 2        | sugar oligomer                                        | 2.5                                                                                  | 230                              | 815, 487, 367,<br>327, 283, 265,<br>251, <u>236</u>   | <u>207</u>                                                     |                                         | V             |                    |                       |
| 3*       | phenylacetic acid<br>hexoside phosphate <sup>c)</sup> | 2.9, 3.6                                                                             | 208, sh<br>256/ 220,<br>272      | <u>377</u> <sup>a)</sup>                              | 297, 285, 241,<br>215, <u>135</u>                              |                                         | V             |                    |                       |
| 4*       | phenyl lactic acid-<br>glucarate <sup>c)</sup>        | 3.1*, 4.2,<br>7.8                                                                    | 212, 228,<br>250, sh<br>270*     | <u>357</u> <sup>a)</sup>                              | 311, 285, 238,<br><u>209</u> , 191, <u>181</u> ,<br>152, 124   | <u>124</u>                              |               | V                  |                       |
| 5        | unidentified                                          | 4.1-4.5                                                                              | sh 218,<br>264                   | 611, 397, <u>309</u>                                  | <u>294</u> , 279, 263,<br>249                                  | <u>279</u> , 263, 250                   | V             |                    |                       |
| 6        | glutamic acid-<br>diketopiperazine <sup>c)</sup>      | 4.5                                                                                  | 270                              | 515 <sup>b)</sup> , <u>257</u> <sup>a)</sup> ,<br>239 | <u>239</u>                                                     | <u>128</u>                              |               | V                  |                       |
| 7        | unidentified                                          | 5.1                                                                                  | sh 216,<br>268                   | <u>611</u> <sup>b)</sup>                              | 593, 482, 338,<br><u>306</u> <sup>a)</sup> , 288,<br>272, 254, | 288, 272, <u>254</u> , 210,<br>179, 160 | V             |                    |                       |
| 8*       | unidentified<br>isomers                               | 7.5 – 9.6                                                                            | 208, 270                         | 371 <sup>a)</sup> , <u>309</u> ,<br>293, 279          | <u>294</u> , 279, 263                                          | 279, <u>278</u> , 263, 250              | V             |                    |                       |
| 9*       | caffeoyl glucarate<br>isomers                         | 8.5, 9.3,<br>10.3, 10.4,<br>11.0, 11.4,<br>11.5, 12.7,<br>13.0, 13.4*,<br>14.3, 15.0 | sh 214,<br>sh 298,<br>326        | <u>371</u> <sup>a)</sup> , 209                        | <u>209</u> , 191                                               | <u>191</u> , 85                         | V             | V                  | [31]                  |

| Peak No. | Constituent                                                               | t <sub>R</sub> [min]                                              | λ <sub>max</sub> (HPLC-DAD) [nm] | Mass spectrometric data                                  |                                      |                                                     | Water extract | Fermented extracts | Literature reference* |
|----------|---------------------------------------------------------------------------|-------------------------------------------------------------------|----------------------------------|----------------------------------------------------------|--------------------------------------|-----------------------------------------------------|---------------|--------------------|-----------------------|
|          |                                                                           |                                                                   |                                  | MS <sup>1</sup> [m/z]                                    | MS <sup>2</sup> [m/z]                | MS <sup>3</sup> [m/z]                               |               |                    |                       |
| 10       | unidentified N-containing compound                                        | 9.7-10.2                                                          | 210, 238, 350                    | <u>184</u> <sup>a)</sup>                                 | 113, 80                              |                                                     |               | V                  |                       |
| 11       | undefined N-containing glutaric acid derivative                           | 9.9                                                               | 254, sh 270                      | <u>565</u> <sup>b)</sup> , 371, 309, 282                 | <u>282</u> <sup>a)</sup>             | <u>150</u> , 133                                    | V             |                    |                       |
| 12*      | <i>p</i> -coumaroyl glucarate isomers                                     | 12.2, 13.8, 13.9, 14.2, 15.1, 15.2, 15.5, 16.1, 16.3, 16.8*, 17.9 | 228, 314*                        | <u>355</u> <sup>a)</sup> , 323, 291, 208, 191            | 337, 209, <u>191</u> , 173, 147, 129 | <u>173</u> , 129, 85                                | V             | V                  | [31]                  |
| 13*      | Feruloyl glucarate isomers                                                | 14.1, 15.7, 16.5, 17.1, 17.3, 18.2, 18.6*, 19.1, 20.3, 21.0       | 220, 236, sh 300, 326            | <u>385</u> <sup>a)</sup> , 355, 191                      | 367, 209, <u>191</u> , 173, 129      | <u>129</u> , <u>85</u>                              | V             | V                  | [31]                  |
| 14       | undefined caffeic acid derivative                                         | 14.7, 14.8                                                        | 314, sh 290, 222                 | 517, <u>499</u> <sup>a)</sup>                            | 467, <u>336</u> , 321, 291           | 321, 291                                            | V             |                    |                       |
| 15*      | undefined N-containing dihydro- <i>p</i> -coumaroyl malic acid adduct     | 17.5, 18.3                                                        | 220, 272, sh 286                 | <u>466</u> <sup>a)</sup>                                 | <u>350</u>                           | <u>300</u> , 288, 274, 261, 256, 246, 217, 189, 133 |               | V                  |                       |
| 16*      | 5-oxo-L-prolyl-L-leucine (isomers) <sup>d)</sup>                          | 18.8, 20.8*                                                       | Sh 218, 282, sh314               | <u>483</u> <sup>b)</sup> , 385, <u>241</u> <sup>a)</sup> | <u>241</u>                           | <u>197</u>                                          |               | V                  | [35,36]               |
| 17       | caffeic acid                                                              | 19.6                                                              | 218, 234, sh 300, 322            | <u>179</u> <sup>a)</sup>                                 | <u>136</u>                           |                                                     |               | V                  |                       |
| 18       | dihydro- <i>p</i> -coumaroyl 2-hydroxyglutaric acids adduct <sup>c)</sup> | 20.3                                                              | 220, 278, sh 288, 332            | <u>457</u> <sup>a)</sup> , 385                           | <u>295</u> , 280, 263, 235           | <u>280</u> , 263, 238, 180, 165, 114                |               | V                  |                       |

| Peak No. | Constituent                                                    | t <sub>R</sub> [min] | λ <sub>max</sub> (HPLC-DAD) [nm] | Mass spectrometric data                                 |                                |                                                          | Water extract | Fermented extracts | Literature reference* |
|----------|----------------------------------------------------------------|----------------------|----------------------------------|---------------------------------------------------------|--------------------------------|----------------------------------------------------------|---------------|--------------------|-----------------------|
|          |                                                                |                      |                                  | MS <sup>1</sup> [m/z]                                   | MS <sup>2</sup> [m/z]          | MS <sup>3</sup> [m/z]                                    |               |                    |                       |
| 19       | 12-hydroxy-jasmonate sulfate <sup>d)</sup>                     | 21.3                 |                                  | <u>305</u> <sup>a)</sup>                                | <u>225</u> , 165, 97           | <u>181</u>                                               | V             | V                  | [34]                  |
| 20*      | undefined N-containing caffeoyl 2-hydroxyglutaric acid adduct, | 21.4*, 23.6          | Sh 216, 288, sh 312              | <u>480</u> <sup>a)</sup>                                | <u>350</u>                     | <u>300</u> , 288, 274, 256, 246, 231, 189                |               | V                  |                       |
| 21       | unidentified N-containing compound                             | 22.6                 | 222, 274, 318                    | <u>471</u> <sup>a)</sup>                                | <u>381</u>                     | <u>249</u> , 161                                         | V             | V                  |                       |
| 22*      | <i>cis</i> -phaseolic acid-isomer                              | 25.7                 | 322                              | <u>295</u> <sup>a)</sup> , 179, 133,                    | <u>179</u> , <u>133</u>        |                                                          | V             |                    | [31]                  |
| 22*      | <i>trans</i> -phaseolic acid isomer                            | 26.5                 | 218, 240, sh 304, 326            | <u>591</u> <sup>b)</sup> ,                              | <u>295</u> <sup>a)</sup> , 179 | <u>179</u> , 133                                         | V             | V                  | [31]                  |
| 23       | 2-hydroxyglutaroyl ketoglutaric acid adduct <sup>c)</sup>      | 27.6                 | 300                              | <u>551</u> <sup>b)</sup> , 275                          | <u>275</u> <sup>a)</sup>       | <u>147</u> , 127, 109                                    |               | V                  |                       |
| 24       | Undefined flavonoid C-di-glycoside                             | 29.2                 | 216, 270, 330                    | <u>593</u> <sup>a)</sup>                                | 503, 473, 383, <u>353</u>      | <u>325</u> , 297                                         |               | V                  |                       |
| 25       | alkaloid artefact (hermidin dimer) <sup>c), d)</sup>           | 32.4                 | 390, 280, 226                    | 367 <sup>a)</sup> , <u>349</u>                          | <u>334</u> , 272, 234          | 306, 291, <u>272</u> , 259, 244, 233, 217, 205, 176, 134 | V             |                    | [29]                  |
| 26       | <i>trans</i> -mercurialis acid                                 | 34.3                 | 218, 242, sh 304, 328            | 619 <sup>b)</sup> , <u>309</u> <sup>a)</sup> , 147, 129 | 179, <u>147</u> , 129          | <u>129</u>                                               | V             | V                  | [31]                  |
| 27       | undefined caffeic acid derivative                              | 35.1                 | 324                              | <u>391</u> <sup>a)</sup>                                | <u>179</u> , 161, 143, 119     | <u>143</u> , 131, <u>119</u> , 113                       | V             |                    |                       |
| 28*      | kaempferol-rutoside-hexoside                                   | 35.6                 | 266,sh 300, 322, 340             | <u>755</u> <sup>a)</sup>                                | <u>593</u> , 447               | <u>285</u> , 257                                         | V             |                    | [31]                  |

| Peak No. | Constituent                                    | t <sub>R</sub> [min] | λ <sub>max</sub> (HPLC-DAD) [nm] | Mass spectrometric data                    |                                                  |                                   | Water extract | Fermented extracts | Literature reference* |
|----------|------------------------------------------------|----------------------|----------------------------------|--------------------------------------------|--------------------------------------------------|-----------------------------------|---------------|--------------------|-----------------------|
|          |                                                |                      |                                  | MS <sup>1</sup> [m/z]                      | MS <sup>2</sup> [m/z]                            | MS <sup>3</sup> [m/z]             |               |                    |                       |
| 29*      | dihydro-feruloyl histidine <sup>c)</sup>       | 38.6, 39.6*          | 222, 274                         | 665 <sup>b)</sup> , 422, 332 <sup>a)</sup> | 288, 177, 161                                    | 133, 134                          |               | V                  |                       |
| 30       | Feruloyl malate                                | 39.6                 | 238, sh<br>304, 326              | 309 <sup>a)</sup> , 193                    | 178, 149, 134                                    |                                   | V             |                    |                       |
| 31       | quercetin-rutside-hexoside                     | 40.0                 | 258, 266, sh 298, 352            | 771 <sup>a)</sup>                          | 609, 301                                         | 271, 254, 229, 179, 151           | V             |                    | [31]                  |
| 32       | quercetin hexoside-rhamnoside (rutin)          | 42.1                 | 258, sh<br>308, 352              | 609 <sup>a)</sup>                          | 301, 271                                         | 271, 255, 229, 211, 179, 151      | V             |                    | [31]                  |
| 28*      | kaempferol- rutoside-hexosid                   | 43.4                 | 266, sh<br>304, 348              | 755 <sup>a)</sup>                          | 609, 593, 575, 429, 284                          | 429, 284, 255                     | V             | V                  | [31]                  |
| 28*      | kaempferol- rutoside-hexosid                   | 44.4                 | 266, sh<br>304, 346              | 755 <sup>a)</sup>                          | 593, 284, 239                                    | 257, 240, 230, 214, 195, 151, 123 | V             |                    | [31]                  |
| 33       | caffeoyl glycerine aldehyde                    | 44.6                 | 222, sh<br>234, sh<br>302, 326   | 251 <sup>a)</sup>                          | 161                                              | 117                               |               | V                  |                       |
| 34       | feruloyl 2-hydroxy-glutarate                   | 45.7                 | 234, sh<br>302, 326              | 323 <sup>a)</sup> , 193, 129               | 193, 147, 129                                    | 85                                | V             | V                  | [31]                  |
| 35       | undefined<br>2-hydroxyglutaric acid derivative | 46.5                 | -                                | 413 <sup>a)</sup>                          | 371, 327, 300, 256, 243, 221, 199, 186, 168, 130 |                                   | V             |                    |                       |
| 36       | kaempferol-rutosid                             | 47.1                 | 266, sh<br>302, 346              | 593 <sup>a)</sup>                          | 285                                              | 267, 257, 229, 213, 197, 151      |               |                    | [31]                  |
| 37       | bis-dihydro-feruloyl sulfate <sup>c), d)</sup> | 48.4                 | 230, 270                         | 453 <sup>a)</sup>                          | 373, 358                                         | 358, 151                          | V             | V                  |                       |
| 38       | feruloyl syringate <sup>c)</sup>               | 49.6                 | -                                | 373 <sup>a)</sup>                          | 211, 193, 179, 161, 149, 143, 131, 119, 113      | 85                                | V             |                    |                       |



| Peak No. | Constituent                           | t <sub>R</sub> [min] | λ <sub>max</sub> (HPLC-DAD) [nm] | Mass spectrometric data  |                                                               |                                                               | Water extract | Fermented extracts | Literature reference* |
|----------|---------------------------------------|----------------------|----------------------------------|--------------------------|---------------------------------------------------------------|---------------------------------------------------------------|---------------|--------------------|-----------------------|
|          |                                       |                      |                                  | MS <sup>1</sup> [m/z]    | MS <sup>2</sup> [m/z]                                         | MS <sup>3</sup> [m/z]                                         |               |                    |                       |
| 39       | unidentified<br>N-containing compound | 49.6                 | 230, 270                         | <u>454</u> <sup>a)</sup> | 410, <u>392</u> , 364, 348, 316, 288, 256, 221, 195, 170, 155 | 364, <u>348</u> , 320, 288, 256, 221, 210, 195, 170, 155, 137 |               | V                  |                       |

\*For references see main publication. <sup>a)</sup>[M-H]<sup>-</sup>; <sup>b)</sup>[2M-H]<sup>-</sup>; <sup>c)</sup>Tentatively assigned; <sup>d)</sup>Assignment based on HR-ESI-pos/negMS experiments.

## HR-ESI-HPLC-MS Analyses

For determination of the exact molecular weights of constituent **16\***, a solution of the LBF extract (5.7 mg/ml in ACN/water = 1 : 1, v/v) was applied to an Agilent 1290 UHPLC system (Agilent Technologies Inc., Palo Alto, USA) coupled to a QExactive Plus Orbitrap quadrupol-mass spectrometer (Thermo Fisher Scientific, Dreieich, Germany). Chromatographic separation of the analytes was performed on a ACQUITY UPLC HSS T3, C18-RP column (100 Å pore size, 1.8 µm particle size, 150 x 2.1 mm i.d., Waters Corporation, Milfort, MA , USA) at 40 °C. The mobile phase consisted of HCOOH/H<sub>2</sub>O 0.1/99.9 (v/v; eluent A) and ACN/HCOOH 99.9/ 0.1 (v/v; eluent B). The injection volume was 3 µL, and the gradient used was as follows: 0 - 8 min, 7 - 15 % B; 8 - 13 min, 15 – 21 % B; 13 - 23 min, 21 - 65 % B; 23 - 30 min, 65 – 100 % B; 30 - 33 min, 100 % B, 33 - 37 min, 7 % B, at a flow rate of 0.4 ml/min. Full scan mass spectra (ESI, mass range  $m/z$  150 – 1000) of HPLC eluates were recorded during chromatographic separation in the positive/negative ionization mode. The mass spectra were acquired in positive and negative mode with a spray voltage at 4200V/3500 V. Sheath gas was set to 60°C, aux gas 10°C, capillary temperature was 360°C and the heater temperature at 380°C. The scan range was used from 100 to 1500  $m/z$  at a resolution of 70,000 Da. Data dependent MS/MS spectra were generated for the 5 most abundant precursor ions with a resolution of 17.500 and a stepped collision energy of 17,45,60 eV.

| m/z       | Theo. Mass | Delta (ppm) | RDB equiv. | Composition   |
|-----------|------------|-------------|------------|---------------|
| 243.13362 | 243.13393  | -1.29       | 3.5        | C11 H19 O4 N2 |
|           | 243.13259  | 4.23        | 4.0        | C9 H17 O3 N5  |
|           | 243.13527  | -6.79       | 8.5        | C12 H15 N6    |

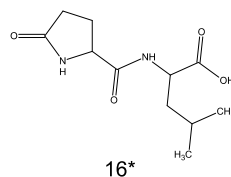

Chemical Formula: C<sub>11</sub>H<sub>18</sub>N<sub>2</sub>O<sub>4</sub>  
Molecular Weight: 242.12

PL\_08\_11\_22\_ab150u\_Grad\_CE25\_45\_61  
HSST3 15cm

12/11/22 11:57:26

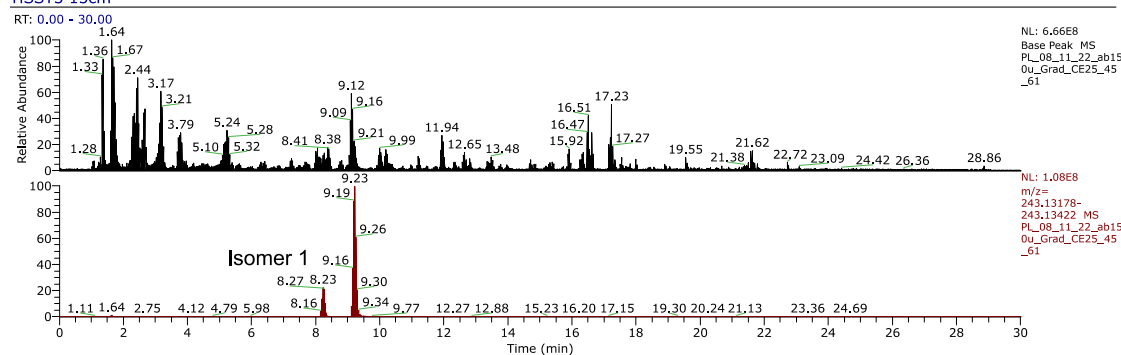

ESI, pos - EIC 243

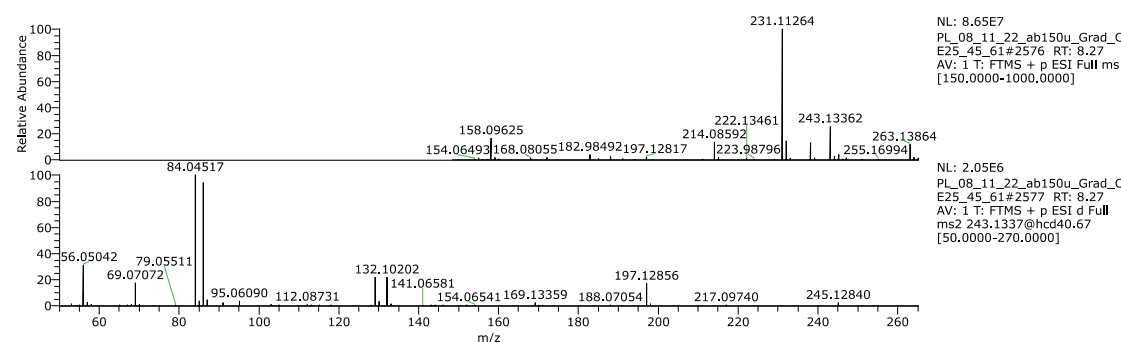

ESI, pos - full scan

ESI, pos - MS2 243

**Figure S3A.** Base peak chromatogram of a Lactobacteria inoculated fermentation extract (LBF) of *M. perennis* with extracted ion chromatogram (mass scan on *m/z* 243; HR-ESI-MS of the peak (*t<sub>R</sub>* 8.2 min) in the positive mode, with calculated masses and proposed molecular formula for metabolite **16\*** (isomer 1).

| m/z       | Theo. Mass | Delta (ppm) | RDB equiv. | Composition   |
|-----------|------------|-------------|------------|---------------|
| 243.13376 | 243.13393  | -0.71       | 3.5        | C11 H19 O4 N2 |
|           | 243.13259  | 4.81        | 4.0        | C9 H17 O3 N5  |
|           | 243.13527  | -6.21       | 8.5        | C12 H15 N6    |

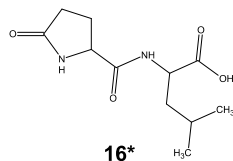

Chemical Formula: C<sub>11</sub>H<sub>18</sub>N<sub>2</sub>O<sub>4</sub>  
Molecular Weight: 242.16

PL\_08\_11\_22\_ab150u\_Grad\_CE25\_45\_61  
HSST3 15cm

12/11/22 11:57:26

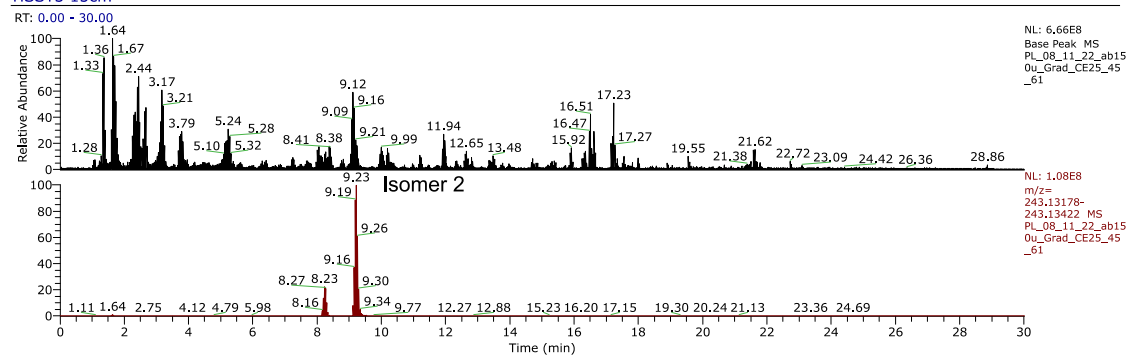

ESI, pos - EIC 243

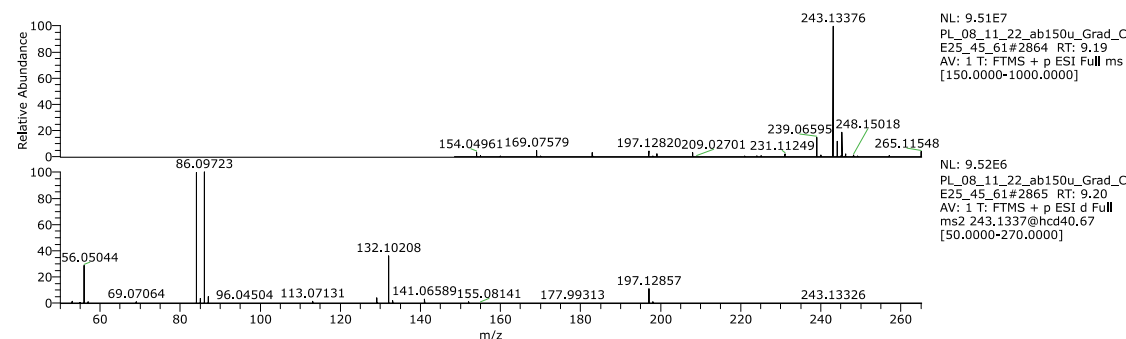

ESI, pos - full scan

ESI, pos - MS2 243

**Figure S3B.** Base peak chromatogram of a Lactobacteria inoculated fermentation extract (LBF) of *M. perennis* with extracted ion chromatogram (mass scan on *m/z* 243; HR-ESI-MS of the peak (*t<sub>R</sub>* 9.2 min) in the positive mode, with calculated masses and proposed molecular formula for metabolite **16\*** (isomer 2).

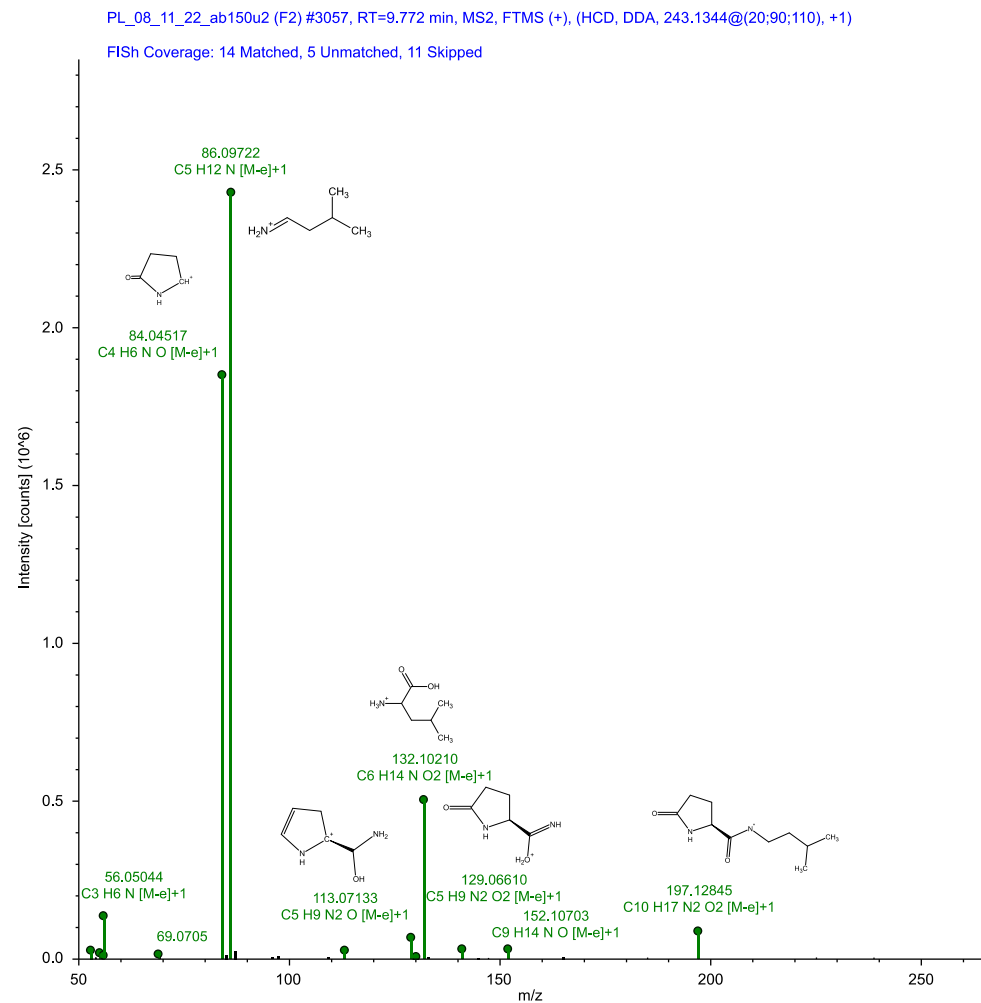

**Figure S3C.** Structure annotation from FISH scoring node on MS<sup>2</sup> spectrum of **16\***. The fragmentation was simulated with the *Compound Discoverer* software, Version 3.3 of Thermo Scientific.

Elemental composition search on mass 305.07053

| m/z       | Theo. Mass | Delta (ppm) | RDB equiv. | Composition                                      |
|-----------|------------|-------------|------------|--------------------------------------------------|
| 305.07053 | 305.07005  | 1.58        | 4.5        | C <sub>12</sub> H <sub>17</sub> O <sub>7</sub> S |
|           | 305.07255  | -6.62       | 0.5        | C <sub>8</sub> H <sub>17</sub> O <sub>12</sub>   |
|           | 305.06668  | 12.63       | 9.5        | C <sub>15</sub> H <sub>13</sub> O <sub>7</sub>   |

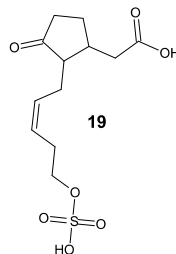

Chemical Formula: C<sub>12</sub>H<sub>18</sub>O<sub>7</sub>S  
Molecular Weight: 306.07

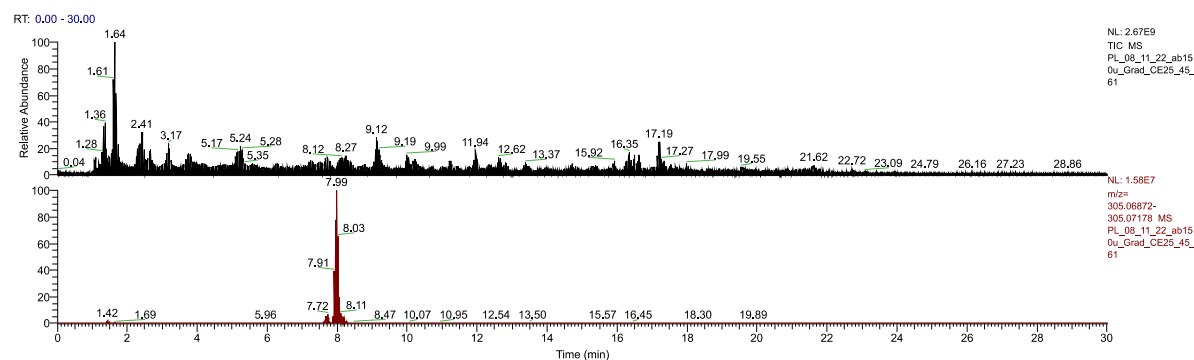

ESI, neg - EIC 305

ESI, neg - fulls scan

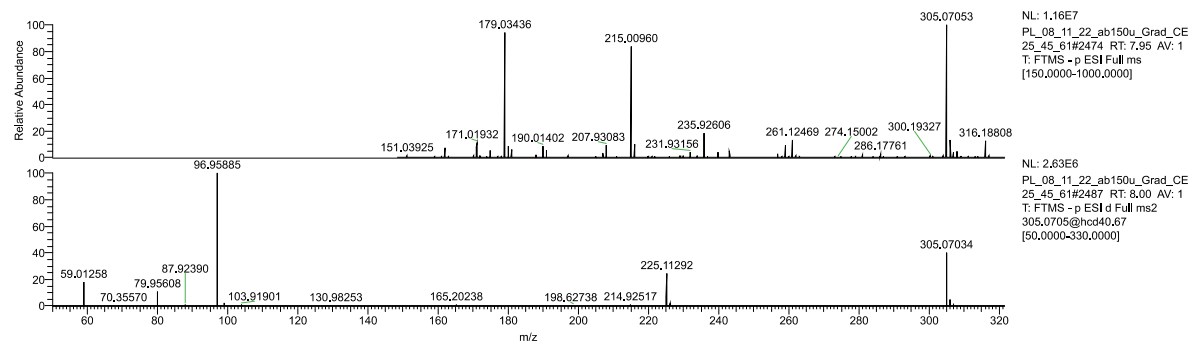

ESI, neg - MS2 305

**Figure S3D.** Base peak chromatogram of a Lactobacteria inoculated fermentation extract (LBF) of *M. perennis* with extracted ion chromatogram (mass scan on *m/z* 305; HR-ESI-MS of the peak (*t<sub>R</sub>* 8.0 min) in the negative mode, with calculated masses and proposed molecular formula for metabolite **19**.

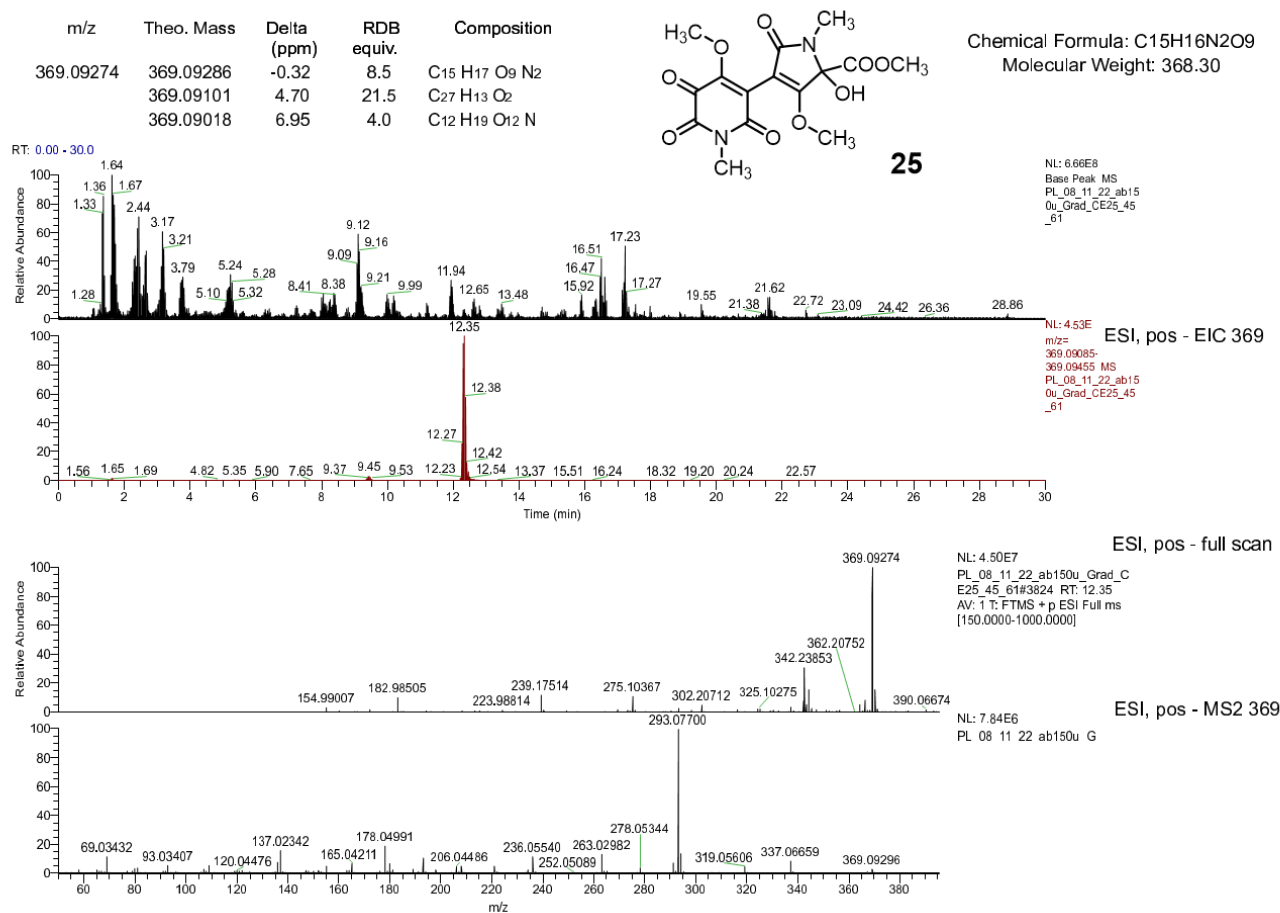

**Figure S3E.** Base peak chromatogram of a Lactobacteria inoculated fermentation extract (LBF) of *M. perennis* with extracted ion chromatogram (mass scan on  $m/z$  369; HR-ESI-MS of the peak ( $t_R$  12.3 min) in the positive mode, with calculated masses and proposed molecular formula for metabolite **25**.

PL\_08\_11\_22\_ab150u\_Grad\_CE25\_45\_60 (F1) #3789, RT=12.211 min, MS2, FTMS (+), (HCD, DDA, 369.0930@(25;45;60), +1)

FISH Coverage: 100 Matched, 254 Unmatched, 61 Skipped

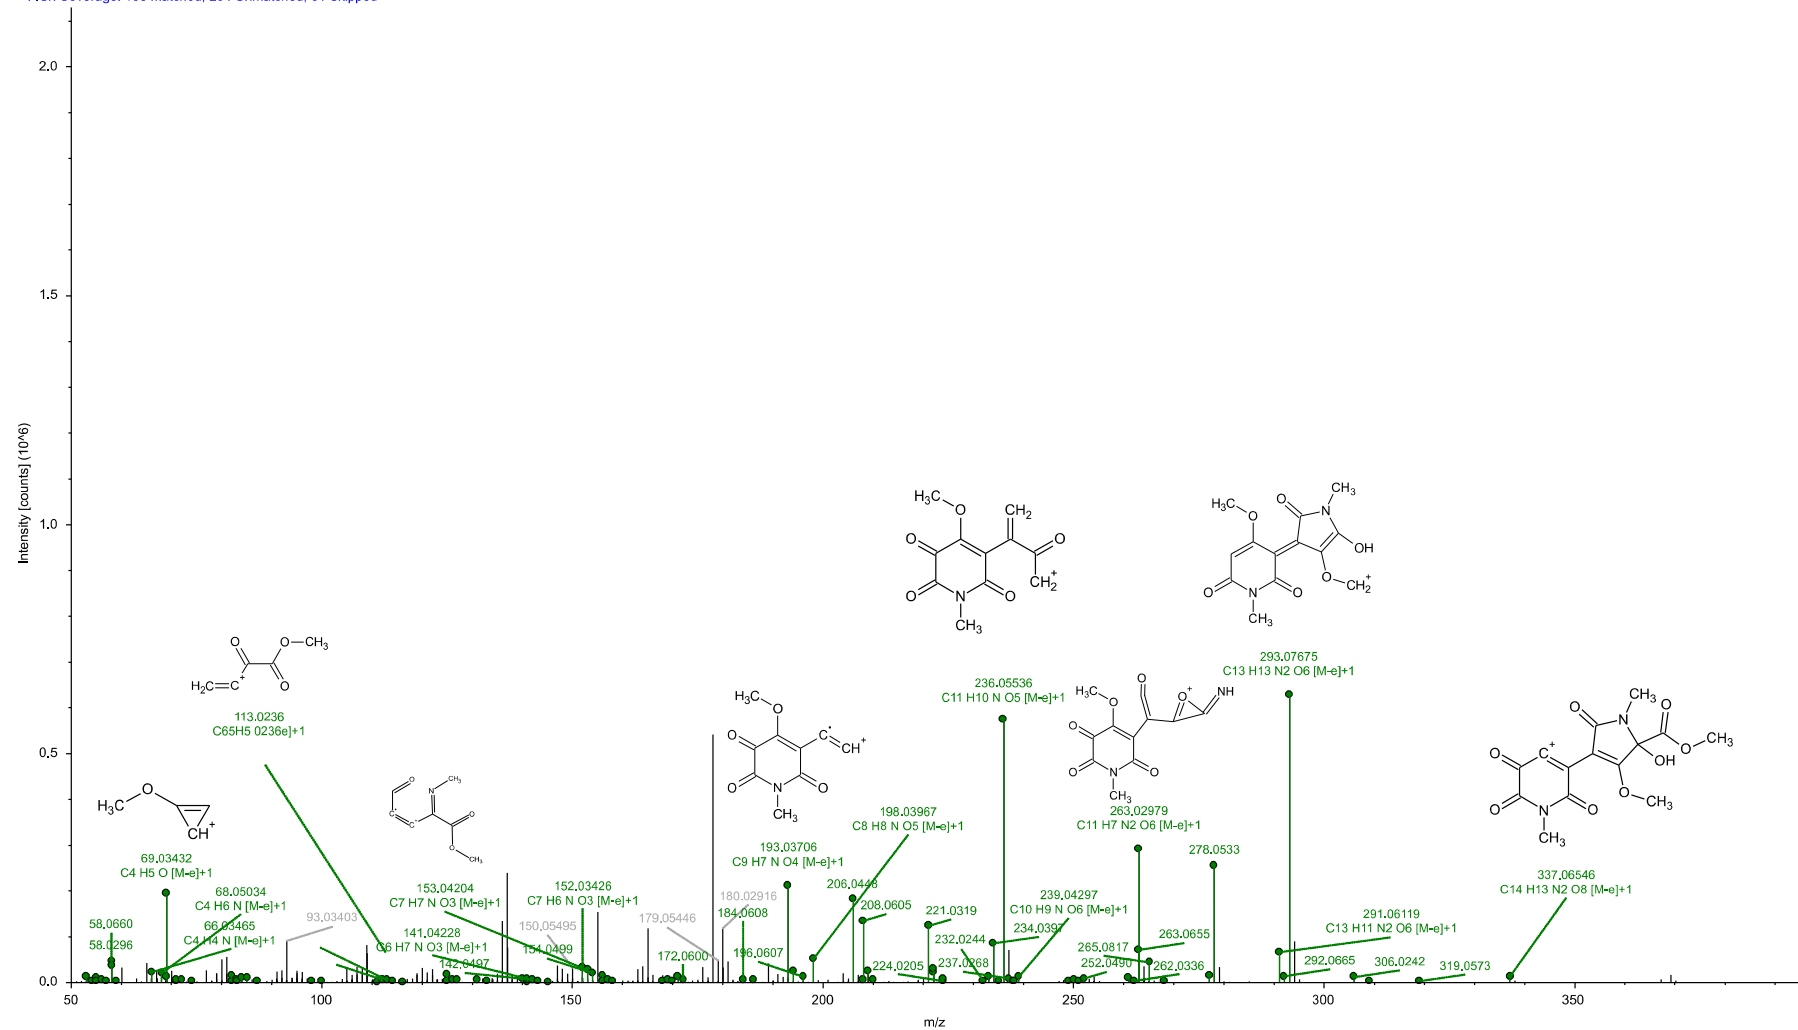

**Figure S3F.** Structure annotation from FISH scoring node on MS<sup>2</sup> spectrum of **25**. The fragmentation was simulated with the *Compound Discoverer* software, Version 3.3 of Thermo Scientific.



Elemental composition search on mass 453.08713

| m/z       | Theo. Mass | Delta<br>(ppm) | RDB<br>equiv. | Composition   |
|-----------|------------|----------------|---------------|---------------|
| 453.08713 | 453.08609  | 2.29           | 10.5          | C20 H21 O10 S |
|           | 453.08859  | -3.23          | 6.5           | C16 H21 O15   |
|           | 453.08272  | 9.73           | 15.5          | C23 H17 O10   |

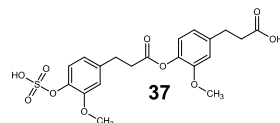

Chemical Formula: C<sub>20</sub>H<sub>23</sub>O<sub>10</sub>P  
Molecular Weight: 454.10

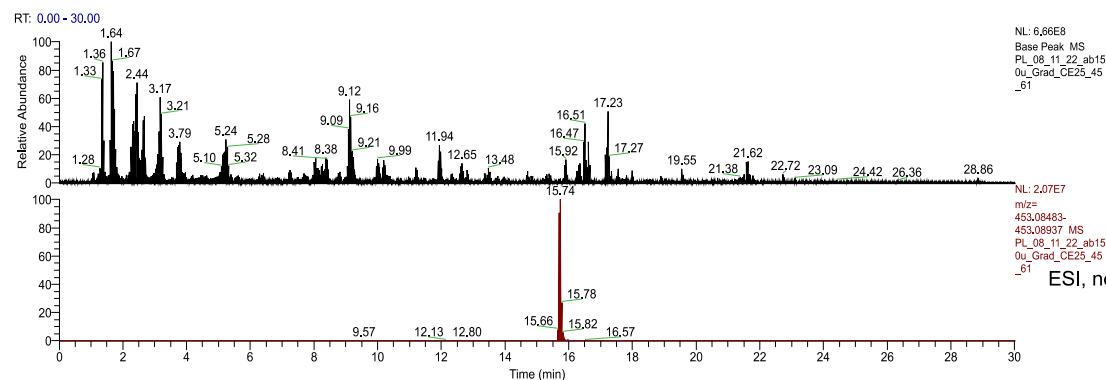

ESI, neg - EIC 453

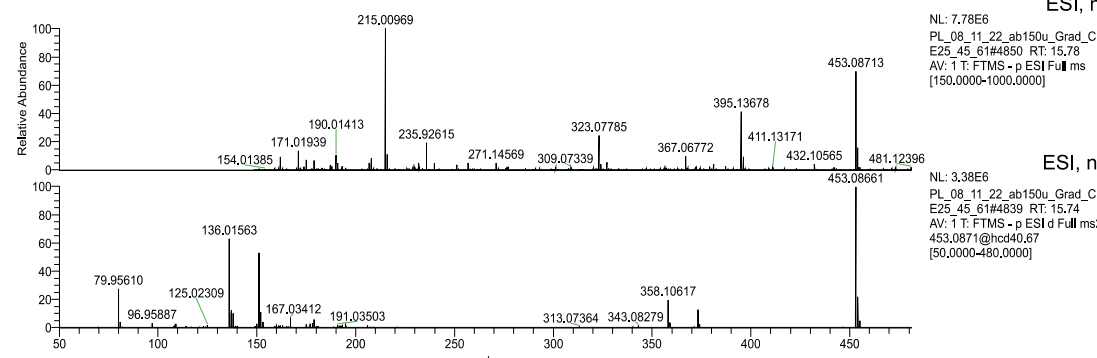

ESI, neg - full scan

ESI, neg - MS2 453

**Figure S3G.** Base peak chromatogram of a Lactobacteria inoculated fermentation extract (LBF) of *M. perennis* with extracted ion chromatogram (mass scan on  $m/z$  453; HR-ESI-MS of the peak ( $t_R$  15.7 min) in the negative mode, with calculated masses and proposed molecular formula for metabolite **37**.

PL\_08\_11\_22\_ab150u\_20221209181441 (F1) #3631, RT=14.303 min, MS2, FTMS (-), (HCD, DDA, 453.0866@ (10:30:60), -1)

FISH Coverage: 13 Matched, 43 Unmatched, 0 Skipped

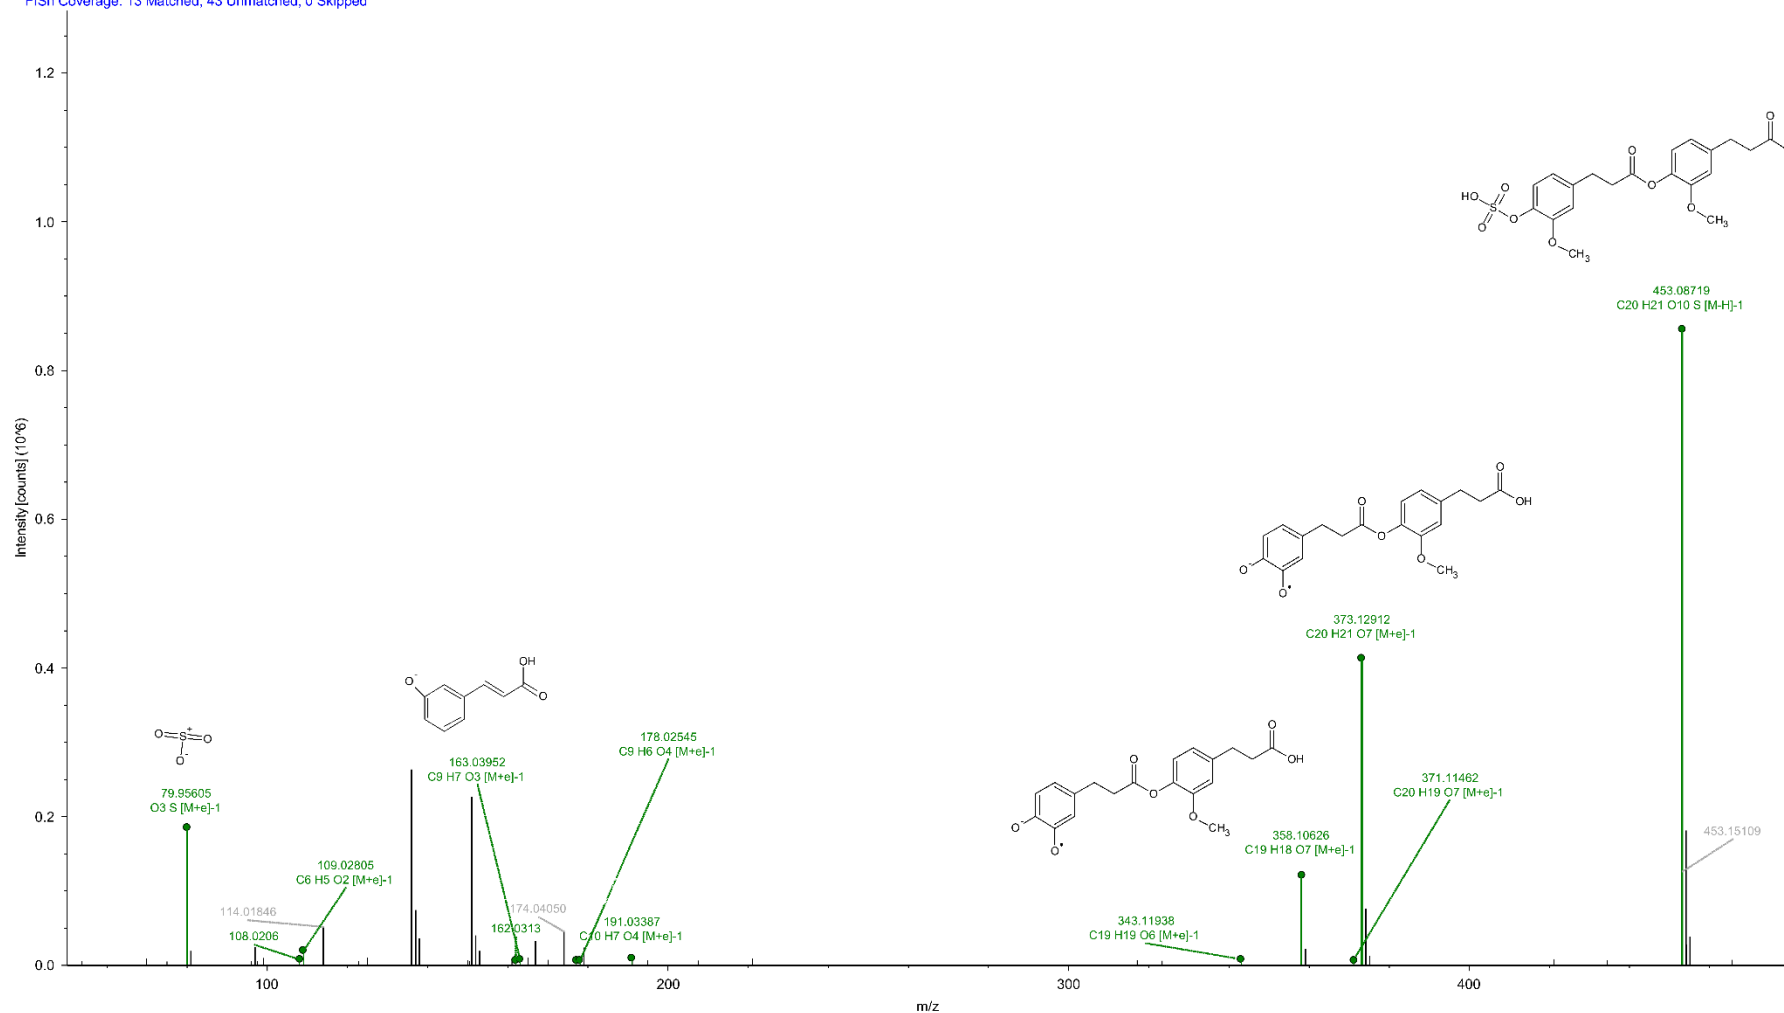

**Figure S3H.** Structure annotation from FISH scoring node on MS<sup>2</sup> spectrum of **37**. The fragmentation was simulated with the *Compound Discoverer* software, Version 3.3 of Thermo Scientific.

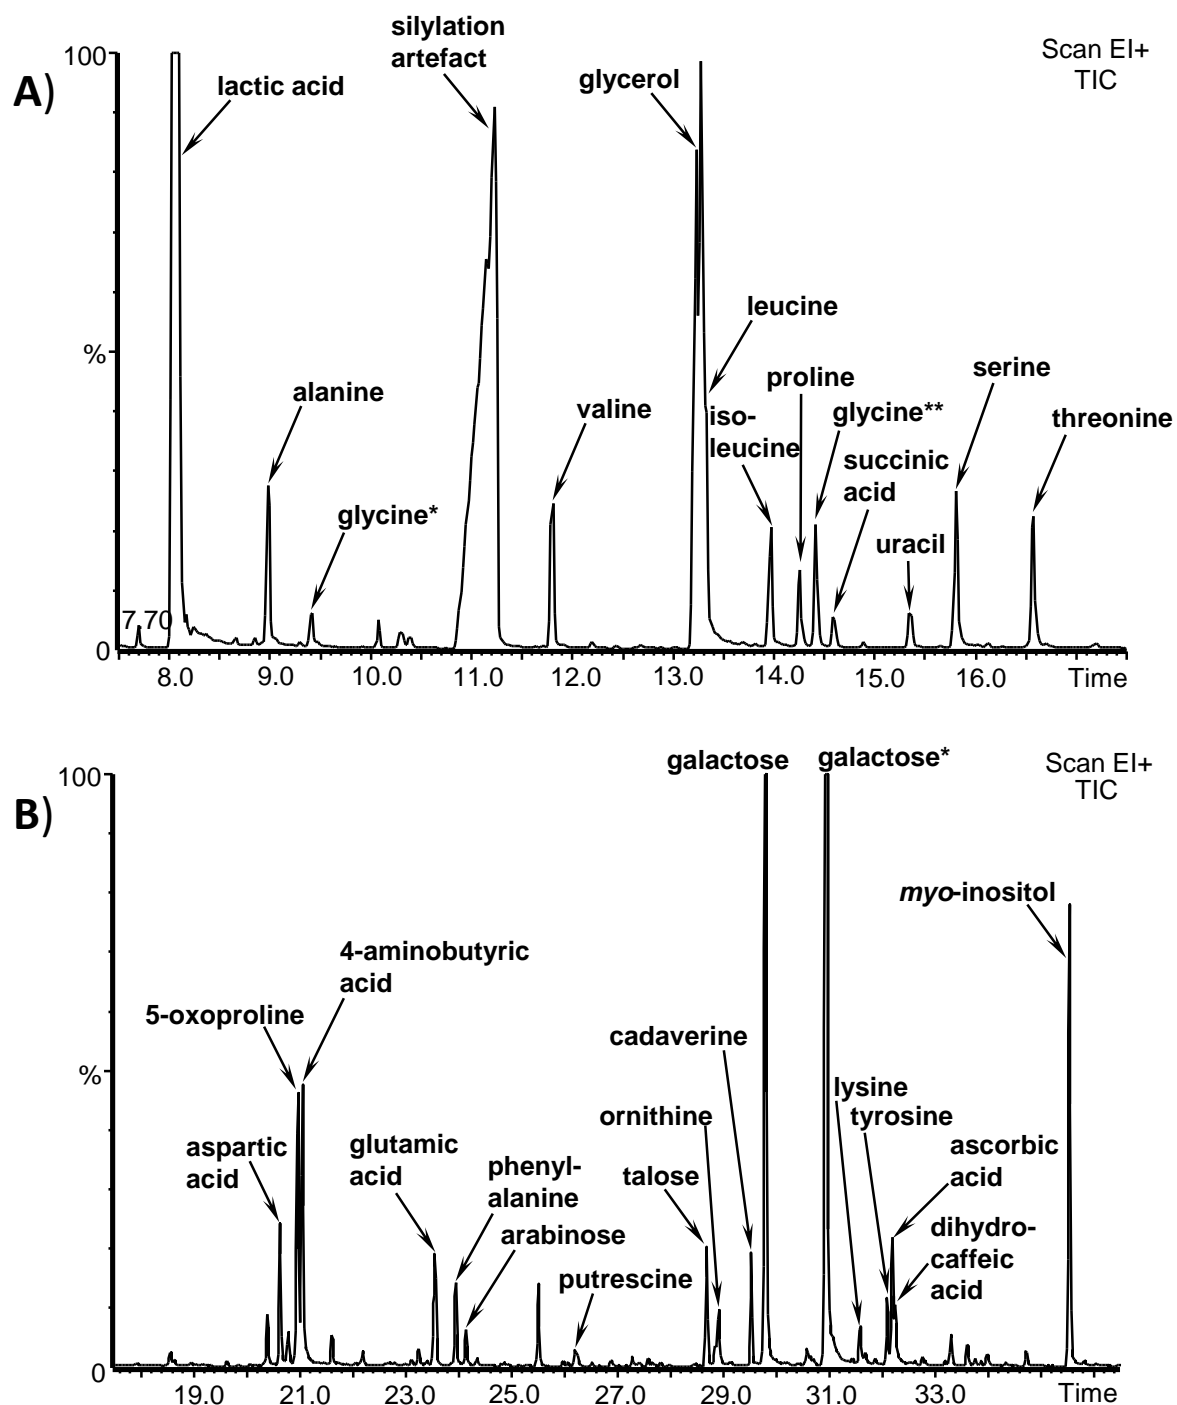

**Figure S4.** GC-MS total ion chromatogram sections of a WF extract, obtained after a HAB procedure, showing low molecular constituents (TMS derivatization). *A)* Section at  $t_R$  7.5 – 17.5 min, the asterisks marks the two glycine TMS derivatives at  $t_R$  9.4 and 14.4 min (\* two and \*\* three TMS units, respectively). *B)* Section at  $t_R$  17.5 – 36.5 min. Constituents were tendentially identified by comparison of the respective mass spectra with the NIST database.

## Viability Assay

THP-1 NFκB-eGFP reporter cells (500 000 cells/mL) were incubated for 24 h with medium (unstim.), dexamethasone (10<sup>-5</sup> M; Sigma Aldrich), or test substances at various concentrations (1, 3, 10, 30, 100, 300, 1000 µg/mL). Cells were washed with PBS and resuspended in 100 µL WST medium (RPMI 1640 medium without phenol red (Fischer Scientific) supplemented with 10% heat-inactivated fetal calf serum (Bioconcept), 2 mM L-glutamine (Sigma Aldrich), 100 U/ml penicillin (Sigma Aldrich), and 100 U/ml streptomycin (Sigma Aldrich)) supplemented with 1:10 WST-1 (Sigma Aldrich). Cells were incubated for 120 additional minutes and the colorimetric measurement was performed on a microplate reader (Tecan Infinite M200).

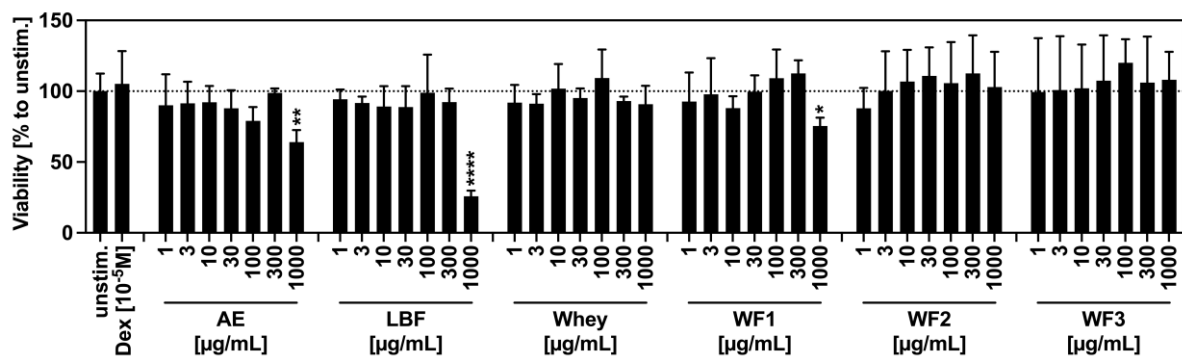

**Figure S5.** Effects of test substances on cell viability of THP-1 NFκB reporter cells determined by WST assay. THP-1 NFκB-eGFP cells incubated for 24 hours with medium (unstim.), dexamethasone (Dex; 10<sup>-5</sup> M), or extracts. The percentage of metabolically active cells was compared and normalized to the unstimulated control and presented as mean ± standard deviation. n = 3; \*p < 0.05, \*\*p < 0.01, \*\*\*p < 0.001, \*\*\*\*p < 0.0001.

### *Determination of Evaporation Residues (Dry Weight) of Liquid Extracts*

Porcelain crucibles (volume: 35 ml) were heated at 105 °C, equilibrated to room temperature in a desiccator and weighed at a precision balance to constant tara weight. Then, aliquots of liquid samples (5.00 ml each) were transferred into crucibles, heated 1 h at 80 °C and thereafter 2 h at 105 °C. After cool down the netto weight was determined (brutto – tara weight). Cytokine concentrations (Fig.XX) were calculated on dry weights.

### Endotoxin (LAL Limulus) Assay

The endotoxin (pyrogen) content was analyzed according to manufactures protocol (Charles River Endosafe Charleston, SC, USA). In brief, on a 96 well plate the test samples (diluted 1 : 100), endotoxin standard, negative control (water) or spiked control (sample + 0,5 I.E./mL endotoxin) were pipetted into each well. Then, 100 µL amoebocytes lysate (diluted with water according manufactures protocol, Charles River) were added and thermostated at 37 °C in the ELISA reader, whereby the optical density was recorded at 340 nm over 53.3 min, until the precipitation (coagulation) was complete. Concentrations were calculated from reaction times at 0.5 extinction units from the Michaelis-Menten-curve. The calibration range was between 0.005 and 5 EU/mL with an r-value of -0.9998 and a recovery of 120%.

**Table S2.** Chemical and physical parameters of tested samples.

| Sample       | Type                                                                                                     | pH value | dry matter<br>content<br>[g/ml] | Lactic acid<br>conc. [g/l],<br>(SEM) | Endotoxin<br>content<br>[EU/ml] |
|--------------|----------------------------------------------------------------------------------------------------------|----------|---------------------------------|--------------------------------------|---------------------------------|
| AE           | H <sub>2</sub> O-extract                                                                                 | 6.54     | 0.00899                         | -0,052<br>(± 0,026)                  | 126.8                           |
| LBF<br>(7 d) | fermentation<br>with starter culture <sup>a)</sup><br>( <i>L. plantarum</i> +<br><i>P. pentosaceus</i> ) | 3.89     | 0.01095                         | 3,446<br>(± 0,089)                   | 42.3                            |
| whey         | whey                                                                                                     | 3.99     | 0.07054                         | 9,779<br>(± 0,368)                   | < 0.5                           |
| WF1 (180 d)  | whey<br>fermentation <sup>b)</sup>                                                                       | 3.97     | 0.04783                         | 14,613<br>(± 0,052)                  | 5.0                             |
| WF 2 (180 d) | whey<br>fermentation <sup>b)</sup>                                                                       | 3.99     | 0.05520                         | 15,338<br>(± 0,026)                  | 12.6                            |
| WF3 (180 d)  | whey<br>fermentation <sup>b)</sup>                                                                       | 3.91     | 0.05168                         | 14,66<br>(± 0,078)                   | 58.7                            |

<sup>a)</sup> Fermentation time 7d; <sup>b)</sup> fermentation time 180 d.
